# Supplementary material
Source: Research Square preprint supplement (doi:10.21203/rs.3.rs-8513800/v1)
Supplement: Supplementary file 1 [file 689b1677963b090cb8752432.docx]

# **Supplementary Information**

**Supplementary Note S1 — Family 403008 (unsolved)**
**Clinical summary:** The proband in family 403008 is a 28-year-old woman from a non-consanguineous Iranian family (Figure S1A). Her hearing loss was first noticed around 1 year of age, suggesting a congenital or very early-onset impairment. A current pure-tone audiogram confirms a bilateral, profound SNHL in the proband (Figure S1B). She has no vestibular complaints and no other medical issues of note, and clinical examination revealed no syndromic features.


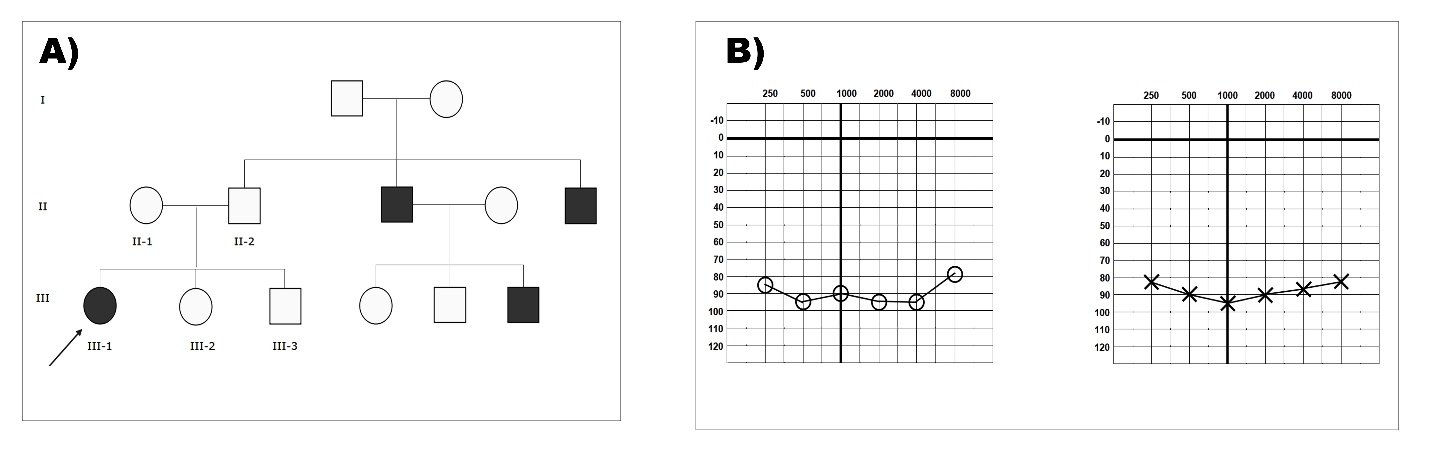


**Figure S1. Figure 5. Pedigree and audiometric phenotype of family 403008 (molecularly unsolved case).** (A) Pedigree of family 403008 showing multiple affected relatives; filled symbols = affected individuals; open = unaffected. Squares = males; circles = females. Proband (III-1, arrow). Generations labeled with Roman numerals; individuals with English numerals beneath each symbol. (B) Pure-tone air-conduction audiogram (0.25–8 kHz) for proband. Right ear (O); left ear (X). Profound bilateral symmetric sensorineural hearing loss across all frequencies.

**Genetic analysis:** WES was performed for this family with an assumption of autosomal recessive inheritance initially. No homozygous or compound heterozygous pathogenic variants were identified in known hearing loss genes under that model. We then considered the possibility of autosomal dominant inheritance, as the pedigree was small and non-consanguineous. Under a dominantly inherited model, a single candidate variant emerged: a heterozygous frameshift insertion in *TECTA* (NM_005422.4: c.4290_4291insA, predicted p.Gly1431ArgfsTer120). *TECTA* encodes α-tectorin, and mutations in this gene can cause dominantly inherited mid-frequency hearing loss. The insertion was present in the proband’s WES data and appeared to be a genuine variant upon read inspection. However, Sanger sequencing of the *TECTA* variant in the family revealed that it did not cosegregate with the hearing loss and the variant was not found in any of the other family members, indicating that it is likely a false positive or an unrelated rare variant. Therefore, despite an extensive search (including analysis of known non-coding regulatory regions and mitochondrial genome sequencing), the genetic cause for hearing loss in Family 403008 remains unresolved. Further research, such as genome sequencing to detect structural variants or deep intronic mutations, may be required to solve this case.

**Supplementary Table S2. Sanger primer pairs for reported variants** (All primer sequences are given 5′ to 3′)

| Gene/Variant | Forward primer (5′→3′) | Reverse primer (5′→3′) |
| --- | --- | --- |
| *MYO7A* c.2904G>T | GGGAAGTCAGAGGCTCCATT | GGACCCAGTTCATCTCTGCT |
| *MYO15A* c.5421del | CCTTTTGCACATGGCTGAG | GCCTGGGTTGTGTATTCCTG |
| *SLC26A4* c.1229C>T | TGAAATACTCAGCGAAGGTCT | AGCCTTCCTCTGTTGCCATT |
| *PRPS1* c.377C>T | CCTGATTTGGAAAAGTGATGTTCC | GACTGCCTCCCTATCTAACCAC |

**Supplementary Table S3. Software versions and database access information**

| Tool or Database | Version / Access details |
| --- | --- |
| Illumina DRAGEN (Bio-IT) | v4.2.4 (pipeline version 07.031.676.4.2.4) |
| wANNOVAR / ANNOVAR | wANNOVAR release 2024-12-07; ANNOVAR release 2025-03-02 |
| gnomAD database | v4.1.0 (access date: 2025-09-03) |
| Iranome database | (access date: 2025-09-03) |
| SpliceAI | v1.3.1 |
| MaxEntScan (via maxentpy) | maxentpy wrapper v0.0.3 (accessed 2025-09-03; commit 60b4fed4) |
| ColabFold (AlphaFold2 pipeline) | Notebook commit 0e2a4b6; ColabFold v1.5.5; AlphaFold2 v2.3.10; JAX v0.5.3 (accessed 2025-09-03) |
| GalaxyRefine (GalaxyWEB) | Refine protocol (GalaxyWEB server, accessed 2025-09-03) |
| DynaMut2 | (web server accessed 2025-09-03) |
| ProDy (Normal mode analysis) | v2.6.1 |
| UCSF ChimeraX | v1.9 |
| MolProbity | v4.5.2 |
| SAVES structural validation | v6.1 (ERRAT, WHATCHECK; accessed 2025-09-03) |
| OMIM database | Updated 29 Aug 2025 (access date: 2025-09-03) |
| ClinVar database | (access date: 2025-09-03) |
| CRYP-SKIP tool | (access date: 2025-09-03) |
| InterVar (ACMG classifier) | 2025-August update (access date: 2025-09-03) |
| Franklin (ACMG classifier) | (access date: 2025-09-03) |
| VarSome (ACMG classifier) | v13.10.1 (access date: 2025-09-03) |
| PolyPhen-2 | v2.2.3 (build r408) (access date: 2025-09-03) |
| CADD | v1.7 (access date: 2025-09-03) |
| MutationTaster | 2025 update (access date: 2025-09-03) |
| Arpeggio (noncovalent bonds) | (access date: 2025-09-03) |
| Waggawagga (SAH prediction) | (access date: 2025-09-03) |
| SIFT | Database updated April 25, 2024 |
| IGV (Integrative Genomics Viewer) | v2.19.5 |
| CodonCode Aligner | v12.0.1 |

**Supplementary Table S4. Cutoffs and threshold used to interpret the predicted scores.**

| Tool | Metric/Score | Threshold Values | Interpretation | Cutoff Values Used in This Research |
| --- | --- | --- | --- | --- |
| SIFT | SIFT score (0–1) | 0.0–0.05 vs 0.05–1.0 | <0.05 = deleterious; ≥0.05 = tolerated (1) | <0.05 (2, 3) |
| PolyPhen-2 | PolyPhen-2 score (0–1) | 0.0–0.15 benign; 0.15–0.85 possibly damaging; ≥0.85 probably damaging | 0–0.15 = benign; 0.15–0.85: possibly damaging; ≥0.85 = probably damaging (4) | ≥0.908 = probably damaging with high confidence (3) |
| MutationTaster2 | Prediction category | N/A (categorical) | disease causing: probably deleterious; disease causing automatic: known to be deleterious;  polymorphism: probably harmless; polymorphism automatic: known to be harmless (5, 6) | disease causing, disease causing automatic (6) |
| CADD | PHRED-scaled CADD score | ≥20 (top 1%); ≥10 (top 10%) | Higher score = more deleterious; ≥20 = among 1% most deleterious variations (7) | ≥25 (8) |
| SpliceAI | SpliceAI Δ score (0–1) | ≥0.5 recommended | Δ score ≥0.5 = likely splice-site alteration; Δ score ≥0.80 = strong splice impact (9) | ≥0.80 = strong splice impact (9, 10) |
| MaxEntScan | MaxEntScan log-odds score | No universal cutoff | Higher scores represent stronger similarity to consensus splice motifs, and lower scores represent weaker matches; a significant decrease in score suggests a weakened splice site. (11) | Difference in MaxEntScan score between wild‑type and variant sequences was used to assess splice site impact; larger score reductions were interpreted as greater evidence of splice disruption, consistent with the methodology used in variant annotation tools. (12) |
| CRYP-SKIP (PcrE) | Probability P (cryptic) | ≥0.5 favors cryptic; <0.5 favors skipping | Outputs probability of cryptic splice-site activation (1) vs exon skipping (0) (13) | <0.5 favors exon skipping (13) |
| DynaMut2 | ΔΔG (kcal/mol) | 0 | ΔΔG < 0 = destabilizing; ΔΔG > 0 = stabilizing (14) | Variants with ΔΔG ≤ −1.0 kcal/mol were considered to exhibit substantial destabilizing effects on protein stability relative to the model’s prediction error, with reference to the approximate RMSE (~1.0 kcal/mol) reported for DynaMut2. (14) |
| AlphaFold2 | pLDDT (0–100) | >90 highest; 70–90 confident; <70 low | >90 = very high confidence; 70–90 = generally correct; <50 = low confidence (15) | Use pLDDT as confidence only (no cutoff) |
| PhyloP100 | Conservation score (ranges from -20 to +30) | No universal cutoff; >0 conserved | Higher = stronger conservation (16) | ≥2 = highly conserved site (17) |
| CRYP-SKIP PESS density | Continuous predictor | No standalone threshold | No standalone threshold; must be interpreted through the final logistic model output (PcrE) (13) | no cutoff |
| CRYP-SKIP NN 5’ss density | Continuous predictor | No standalone threshold | No standalone threshold; must be interpreted through the final logistic model output (PcrE) (13) | no cutoff |
| CRYP-SKIP SF2/ASF density | Continuous predictor | No standalone threshold | No standalone threshold; must be interpreted through the final logistic model output (PcrE) (13) | no cutoff |
| CRYP-SKIP FAS-ESS hex2 density | Continuous predictor | No standalone threshold | No standalone threshold; must be interpreted through the final logistic model output (PcrE) (13) | no cutoff |
| CRYP-SKIP EIE | Continuous predictor | No standalone threshold | No standalone threshold; must be interpreted through the final logistic model output (PcrE) (13) | no cutoff |

**Supplementary References**

1. Ng PC, Henikoff S. SIFT: Predicting amino acid changes that affect protein function. Nucleic Acids Res. 2003;31(13):3812-4.

2. Vaser R, Adusumalli S, Leng SN, Sikic M, Ng PC. SIFT missense predictions for genomes. Nat Protoc. 2016;11(1):1-9.

3. Ensembl. Ensembl Variation: Prediction of protein function. n.d. [Available from: <https://useast.ensembl.org/info/genome/variation/prediction/protein_function.html>.

4. Badgujar NV, Tarapara BV, Shah FD. Computational analysis of high-risk SNPs in human CHK2 gene responsible for hereditary breast cancer: A functional and structural impact. PLOS ONE. 2019;14(8):e0220711.

5. Schwarz JM, Cooper DN, Schuelke M, Seelow D. MutationTaster2: mutation prediction for the deep-sequencing age. Nat Methods. 2014;11(4):361-2.

6. Onodera S, Saito A, Hasegawa D, Morita N, Watanabe K, Nomura T, et al. Multi-layered mutation in hedgehog-related genes in Gorlin syndrome may affect the phenotype. PLOS ONE. 2017;12(9):e0184702.

7. Rentzsch P, Witten D, Cooper GM, Shendure J, Kircher M. CADD: predicting the deleteriousness of variants throughout the human genome. Nucleic Acids Res. 2019;47(D1):D886-d94.

8. Tollefson MR, Gogal RA, Weaver AM, Schaefer AM, Marini RJ, Azaiez H, et al. Assessing Variants of Uncertain Significance Implicated in Hearing Loss Using a Comprehensive Deafness Proteome. Res Sq. 2023.

9. Jaganathan K, Kyriazopoulou Panagiotopoulou S, McRae JF, Darbandi SF, Knowles D, Li YI, et al. Predicting Splicing from Primary Sequence with Deep Learning. Cell. 2019;176(3):535-48.e24.

10. Institute B. SpliceAI Documentation 2020 [Available from: <https://pypi.org/project/spliceai/1.3.1/>.

11. Yeo G, Burge CB. Maximum entropy modeling of short sequence motifs with applications to RNA splicing signals. J Comput Biol. 2004;11(2-3):377-94.

12. Shamsani J, Kazakoff SH, Armean IM, McLaren W, Parsons MT, Thompson BA, et al. A plugin for the Ensembl Variant Effect Predictor that uses MaxEntScan to predict variant spliceogenicity. Bioinformatics. 2018;35(13):2315-7.

13. Divina P, Kvitkovicova A, Buratti E, Vorechovsky I. Ab initio prediction of mutation-induced cryptic splice-site activation and exon skipping. Eur J Hum Genet. 2009;17(6):759-65.

14. Rodrigues CHM, Pires DEV, Ascher DB. DynaMut2: Assessing changes in stability and flexibility upon single and multiple point missense mutations. Protein Sci. 2021;30(1):60-9.

15. Jumper J, Evans R, Pritzel A, Green T, Figurnov M, Ronneberger O, et al. Highly accurate protein structure prediction with AlphaFold. Nature. 2021;596(7873):583-9.

16. Pollard KS, Hubisz MJ, Rosenbloom KR, Siepel A. Detection of nonneutral substitution rates on mammalian phylogenies. Genome Res. 2010;20(1):110-21.

17. Lee DSM, Park J, Kromer A, Baras A, Rader DJ, Ritchie MD, et al. Disrupting upstream translation in mRNAs is associated with human disease. Nature Communications. 2021;12(1):1515.
